# Supplementary material for: Perinatal Outcomes in Premature Placental Calcification and the Association of a Color Doppler Study: Report from a Tertiary Care Hospital in Eastern India
Source: MDPI journal article supplement (doi:10.3390/clinpract11040099), 2021-11-09

## Supplementary Information

Figure S1: The maternal outcome for the selected cohort of pregnant women

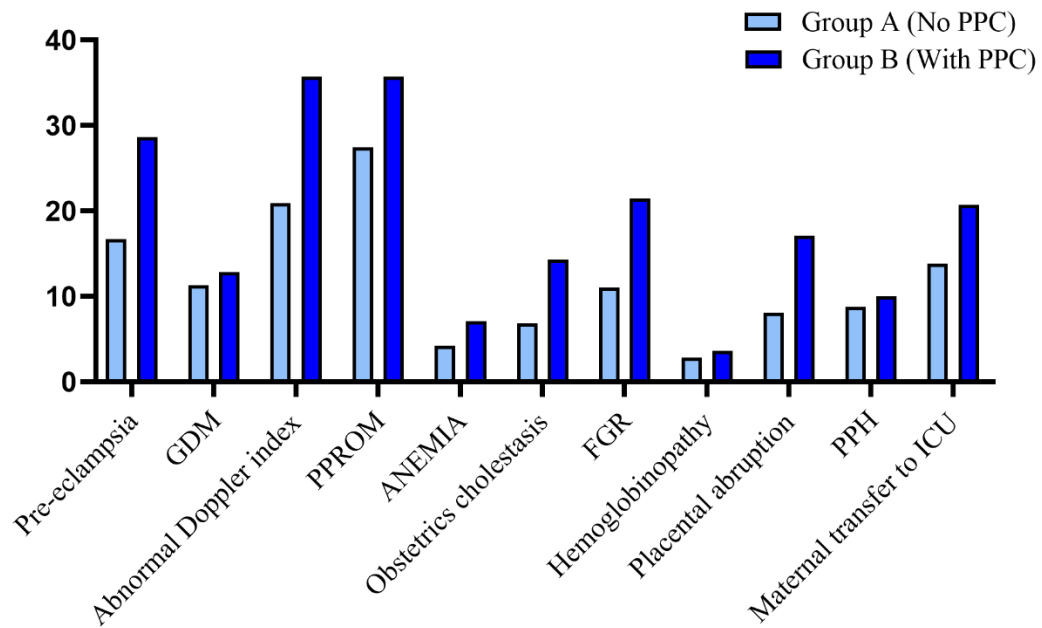

Figure S2: Perinatal outcome for the selected cohort of pregnant women.

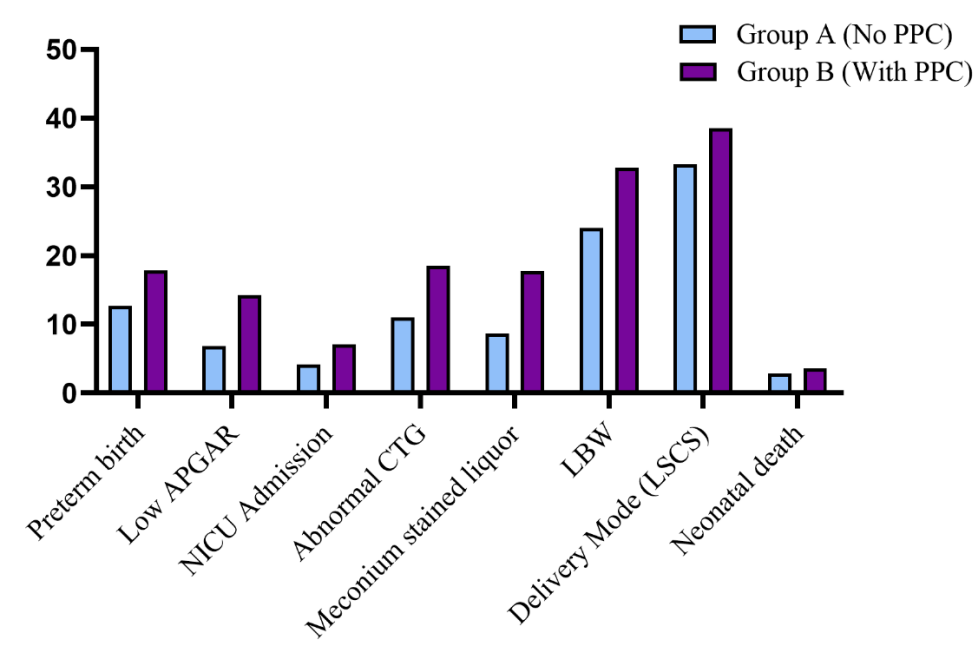

Supplement: s1 [file s1]
